# Supplementary material for: Taguchi orthogonal optimization for the oxidative degradation of 2-chlorophenol using zero valent iron-activated persulfate
Source: Royal Society of Chemistry journal article supplement (doi:10.1039/d5ra01495f), 2025-01-01
Supplement: d5ra01495f1.pdf [file d5ra01495f1.pdf]

## Supplementary Materials

---

### **Taguchi Orthogonal Optimization for the Oxidative Degradation of 2-Chlorophenol using Zero Valent Iron-Activated Persulfate**

Nikka Mae M. Buenaobra<sup>1,2</sup>, Chenju Liang<sup>1,\*</sup>, Xuyen Thi Hong Luong<sup>1</sup>, Khyle Glainmer N.  
Quiton<sup>2</sup>

<sup>1</sup> Department of Environmental Engineering, National Chung Hsing University, 145 Xingda  
Road, South Dist., Taichung City 402202, Taiwan

<sup>2</sup> School of Chemical, Biological, and Materials Engineering and Sciences, Mapúa University,  
Philippines

\*Corresponding author. Tel.: +886-4-22856610; Fax: +886-4-22856610

E-mail address: [cliang@nchu.edu.tw](mailto:cliang@nchu.edu.tw)

## Contents

**Table S1.** Groundwater classification and value limitations of phenols and phenolic compounds.

**Table S2.** Responses for means and S/N ratios

**Table S3.** Characterization of field groundwater.

**Figure S1.** (a) Acid washing procedure on ZVI particles and (b) recovered acid and rinsing water from acid washing of ZVI until neutral pH.

**Figure S2.** (a) Schematic experimental setup and (b) actual experimental setup.

**Figure S3.** 3D full scan spectra of 2-CP using HPLC/PDA, for determination of wavelength (275 nm) and identification of retention time (5.5 min).

**Figure S4.** Example sodium persulfate concentration calibration curve using a spectrophotometry method at a wavelength of 400 nm.

**Figure S5.** Sample logarithmic chloride ion concentration calibration curve.

**Figure S6.** Ion chromatograph of standard (top) and groundwater sample (bottom) for groundwater cation determination.

**Figure S7.** Control tests for 2-CP degradation.

**Figure S8.** PARETO chart of the standardized effects for 2-chlorophenol degradation at 95% confidence level.

**Figure S9.** Interaction plot of different factors for 2-CP degradation from data means.

**Figure S10.** Normal probability plot for 2-CP degradation.

**Figure S11.** Groundwater monitoring well located in the Department of Environmental Engineering of National Chung Hsing University.

**Figure S12.** Results of EDS analysis for (a) unwashed ZVI and (b) acid-washed ZVI in groundwater in the system of 2-CP/SPS (60 mM)/ZVI (60mM)

**Figure S13.** Results of XRD analysis for (a) unwashed ZVI and (b) acid-washed ZVI in groundwater in the system of 2-CP/SPS (60 mM)/ZVI (60mM)

**Table S1.** Groundwater classification and value limitations of phenols and phenolic compounds [1]

| Classification | Intended Beneficial Use                        | Concentration (mg/L) |
|----------------|------------------------------------------------|----------------------|
| Class A        | Source of Potable Water and Other Domestic Use | < 0.001              |
| Class B        | Bathing and Other Primary Contact Recreation   | < 0.001              |
| Class C        | Irrigation, Fish Culture, Livestock Watering   | 0.05                 |

**Table S2.** Responses for means and S/N ratios

| Level | Means      |          |          | S/N ratios |          |          |
|-------|------------|----------|----------|------------|----------|----------|
|       | Initial pH | SPS (mM) | ZVI (mM) | Initial pH | SPS (mM) | ZVI (mM) |
| 1     | 91.79      | 82.95    | 91.07    | 39.24      | 38.36    | 39.16    |
| 2     | 92.43      | 91.27    | 94.42    | 39.30      | 39.20    | 39.49    |
| 3     | 88.53      | 98.53    | 87.26    | 38.89      | 39.87    | 38.78    |
| Delta | 3.90       | 15.58    | 7.16     | 0.41       | 1.51     | 0.71     |
| Rank  | 3          | 1        | 2        | 3          | 1        | 2        |

**Table S3.** Characterization of field groundwater

| Items                                | Value  | Relative error range |
|--------------------------------------|--------|----------------------|
| pH                                   | 6.78   | 0.01                 |
| ORP (mV)                             | 168.17 | 1.59                 |
| Dissolved Oxygen (mg/L)              | 4.06   | 0.06                 |
| Total Dissolved Iron (mg/L)          | 0.22   | -                    |
| Fe <sup>2+</sup> (mg/L)              | 0.15   | 0.01                 |
| Fe <sup>3+</sup> (mg/L)              | 0.07   | 0.01                 |
| Cl <sup>-</sup> (mg/L)               | 14.07  | 0.05                 |
| SO <sub>4</sub> <sup>2-</sup> (mg/L) | 96.26  | 1.08                 |
| F <sup>-</sup> (mg/L)                | 0.13   | -                    |
| Na <sup>+</sup> (mg/L)               | 15.19  | 0.25                 |
| K <sup>+</sup> (mg/L)                | 1.51   | 0.01                 |
| Ca <sup>2+</sup> (mg/L)              | 70.05  | 0.32                 |
| Mg <sup>2+</sup> (mg/L)              | 14.10  | 0.03                 |
| Alkalinity (mg CaCO <sub>3</sub> /L) | 135.00 | -                    |
| Hardness (mg CaCO <sub>3</sub> /L)   | 236.50 | 1.50                 |
| Spiked 2-CP (mM)                     | 1      | -                    |

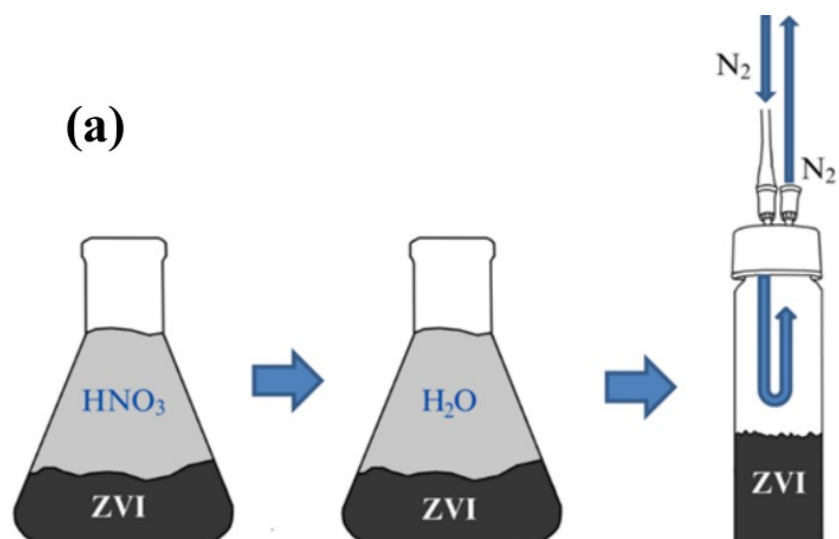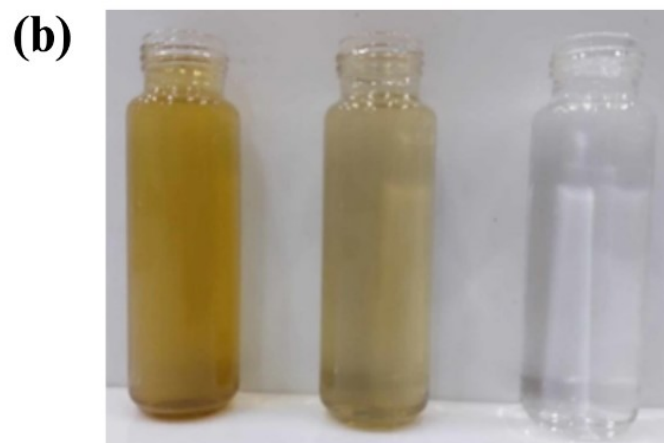

**Figure S1.** (a) Acid washing procedure on ZVI particles and (b) recovered acid and rinsing water from acid washing of ZVI until neutral pH.

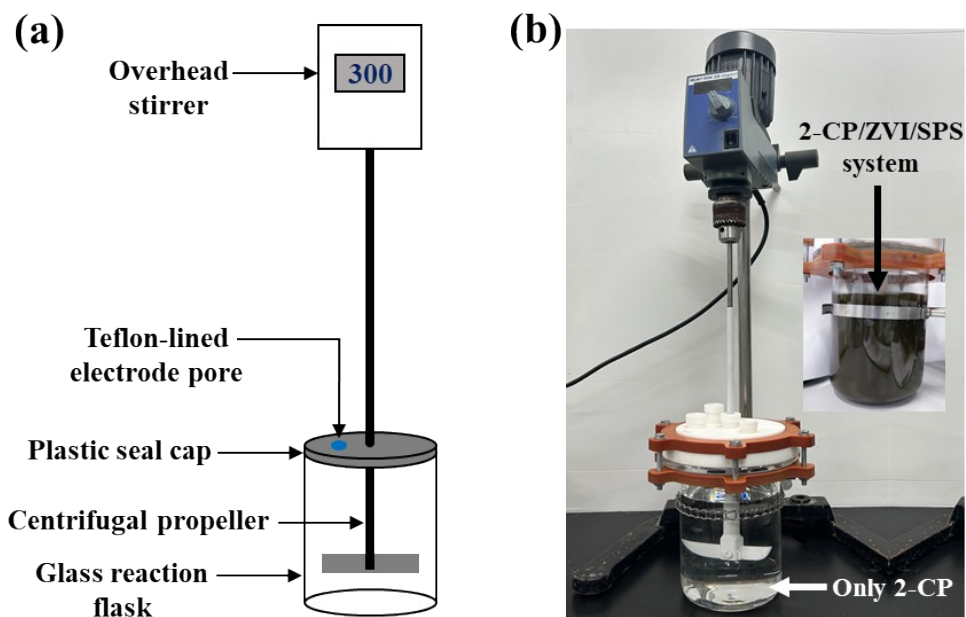

A one-liter glass reaction flask with a Teflon-seal top cover was used for the 2-CP degradation experiment. An overhead stirrer (IKA, RW 20 digital) set at 300 rpm was used during the course of reaction for mixing in the system.

**Figure S2.** (a) Schematic experimental setup and (b) actual experimental setup.

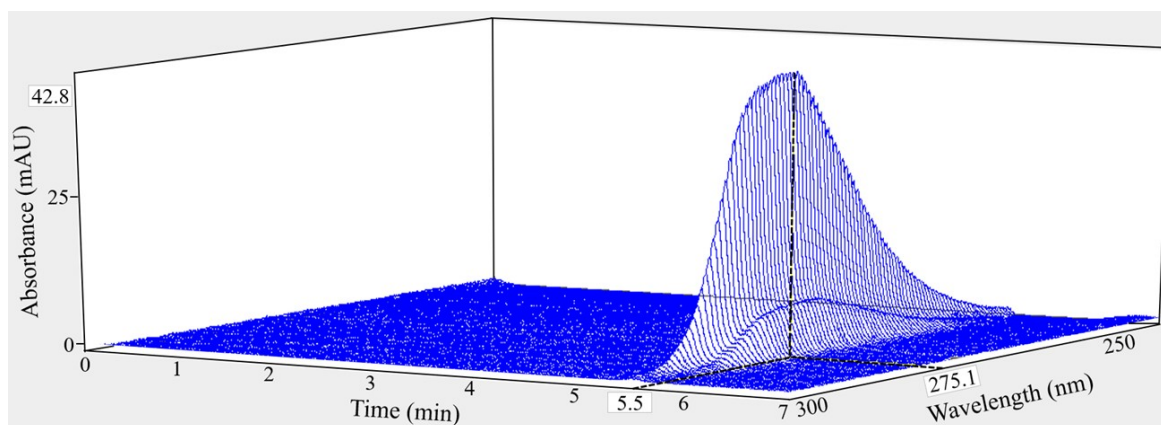

**Figure S3.** 3D full scan spectra of 2-CP using HPLC/PDA, for determination of wavelength (275 nm) and identification of retention time (5.5 min).

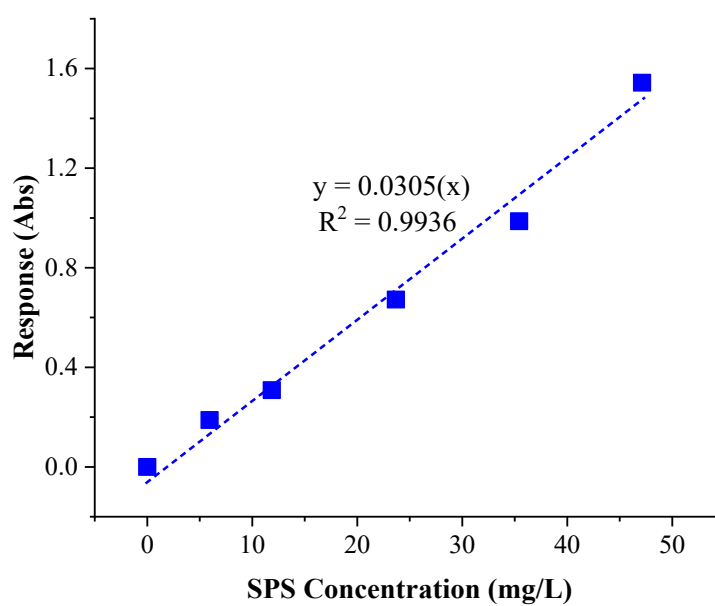

**Figure S4.** Example sodium persulfate concentration calibration curve using a spectrophotometry method at a wavelength of 400 nm.

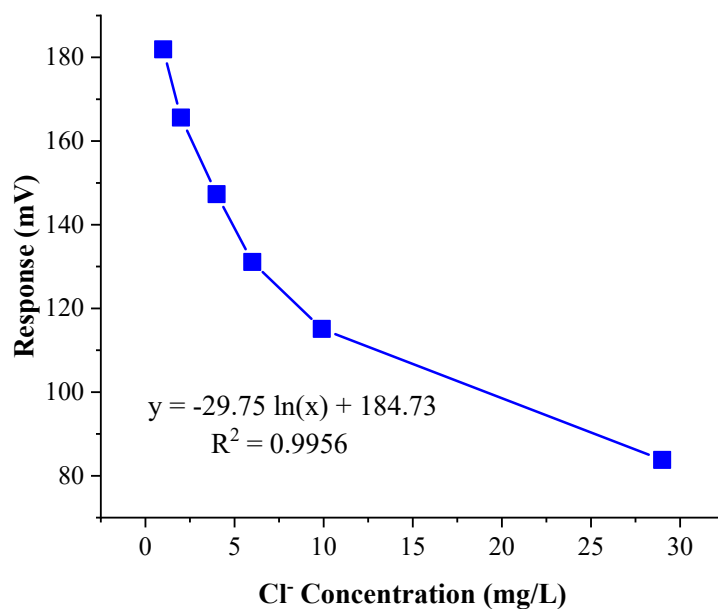

**Figure S5.** Sample logarithmic chloride ion concentration calibration curve.

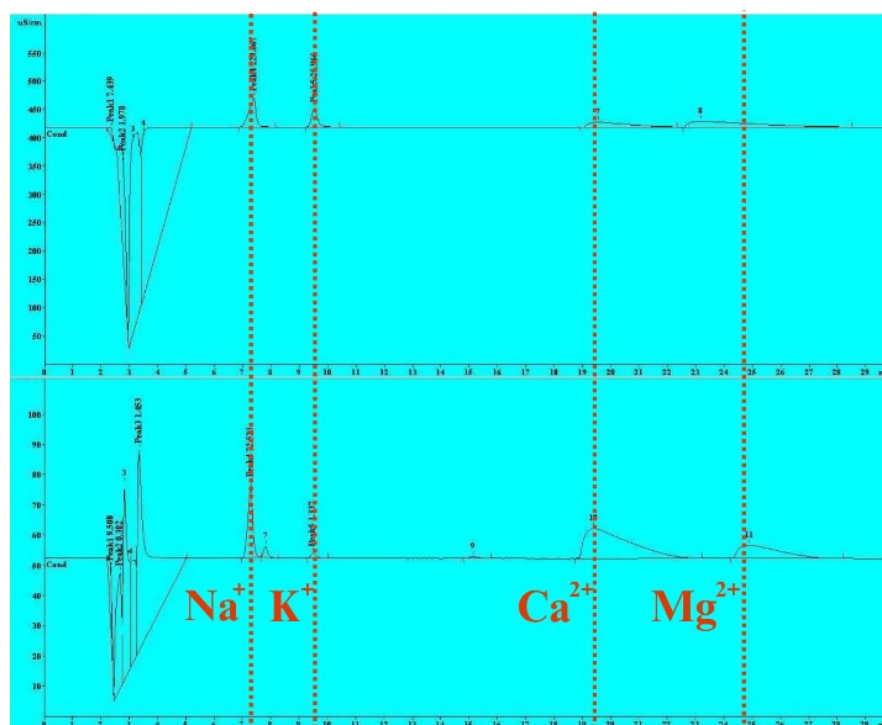

**Figure S6.** Ion chromatograph of standard (top) and groundwater sample (bottom) for groundwater cation determination.



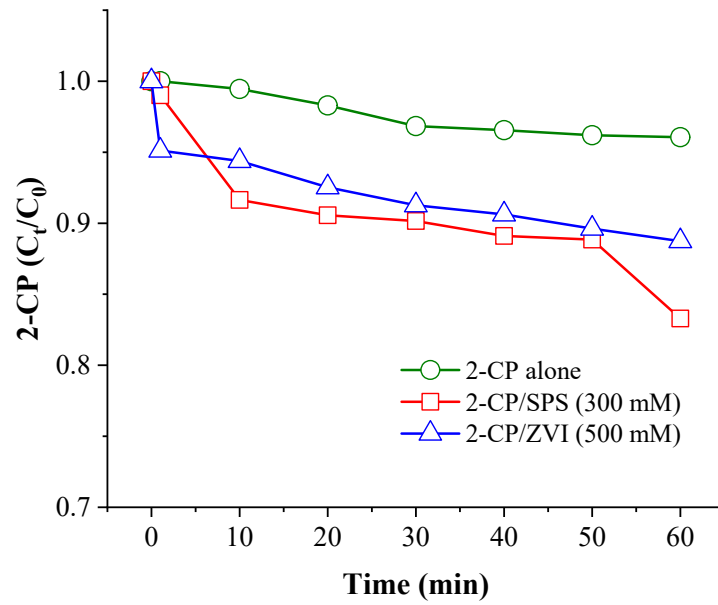

**Figure S7.** Control tests for 2-CP degradation.

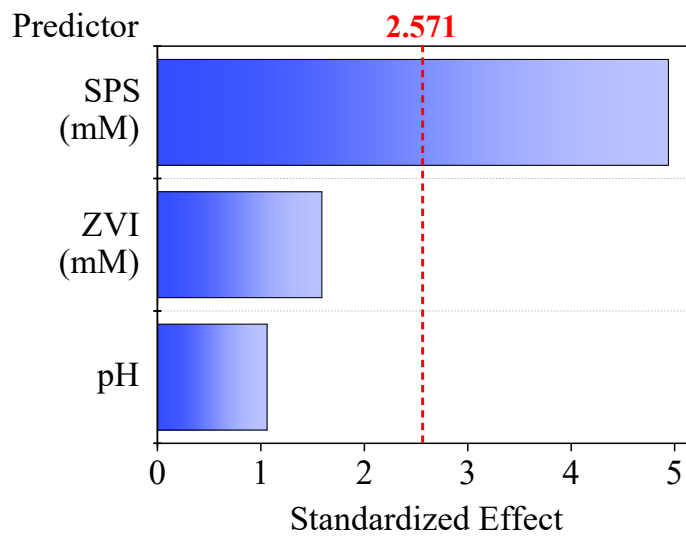

**Figure S8.** PARETO chart of the standardized effects for 2-chlorophenol degradation at

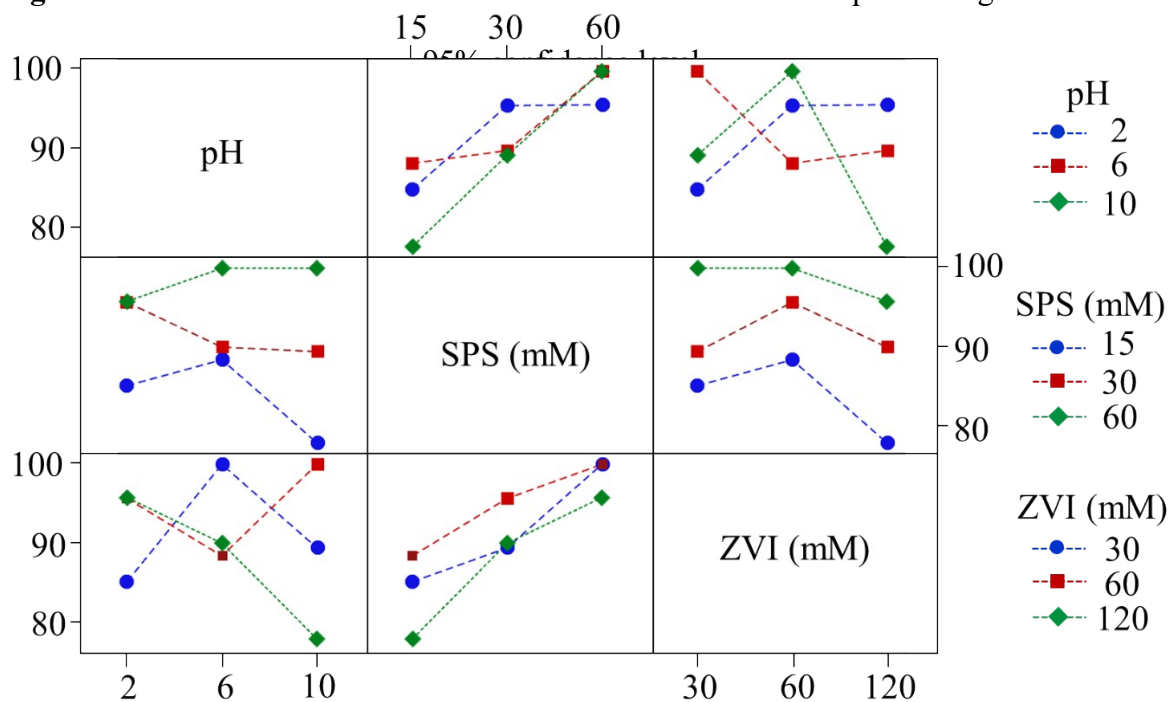

**Figure S9.** Interaction plot of different factors for 2-CP degradation from data means.

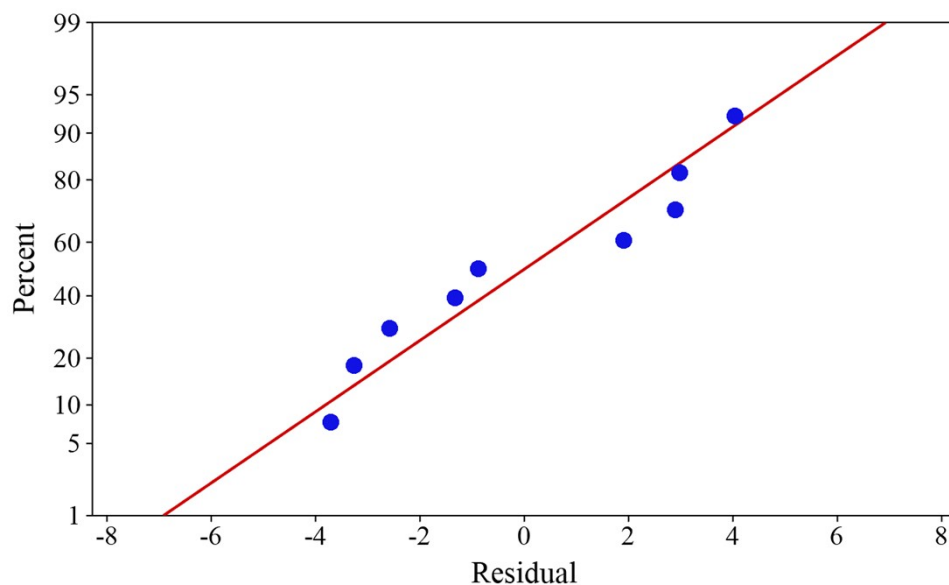

**Figure S10.** Normal probability plot for 2-CP degradation.

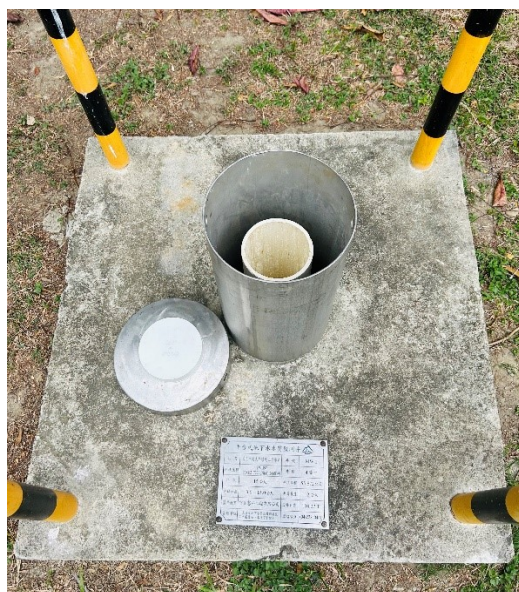

**Figure S11.** Groundwater monitoring well located in the Department of Environmental Engineering of National Chung Hsing University.

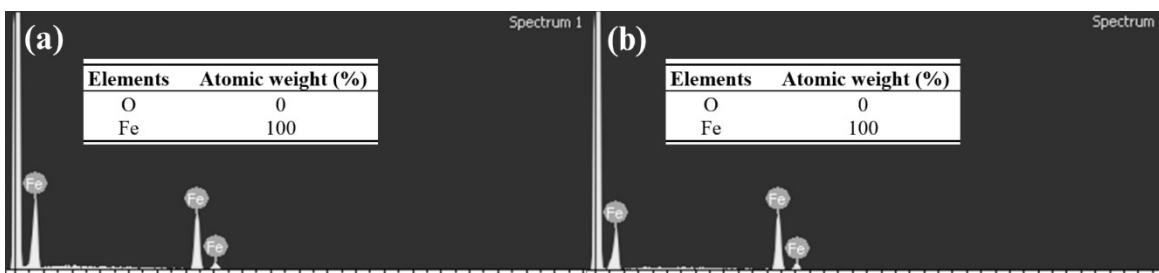

**Figure S12.** Results of EDS analysis for **(a)** unwashed ZVI and **(b)** acid-washed ZVI in groundwater in the system of 2-CP/SPS (60 mM)/ZVI (60mM)

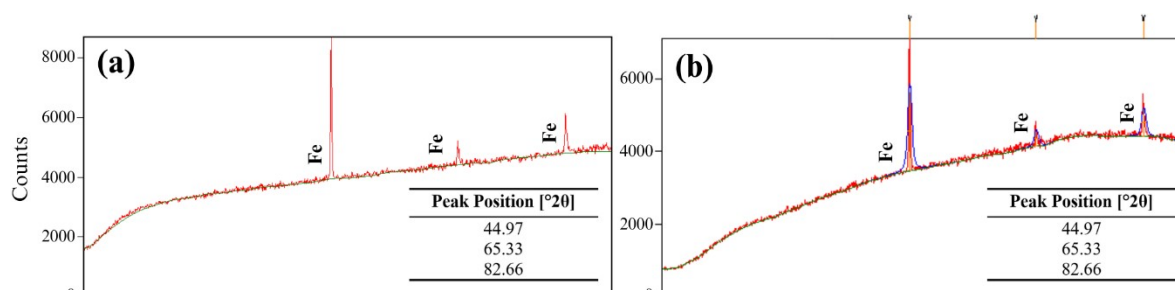

## **Reference**

[1] PDENR, Water Quality Guideline and General Effluent Standards of 2016. In DENR/2016-08, Republic of the Philippines - Department of Environmental and Natural Resources (PDENR).
